# Supplementary material for: Discovery of a Novel DNA Gyrase-Targeting Antibiotic through the Chemical Perturbation of Streptomyces venezuelae Sporulation
Source: PubMed Central journal article supplement (PMC6856721; doi:10.1016/j.chembiol.2019.06.002), 2019-09-19
Supplement: mmc1.pdf [file mmc1.pdf]

**Cell Chemical Biology, Volume 26**

**Supplemental Information**

**Discovery of a Novel DNA Gyrase-Targeting  
Antibiotic through the Chemical Perturbation  
of *Streptomyces venezuelae* Sporulation**

**Scott McAuley, Alan Huynh, Alison Howells, Chris Walpole, Anthony Maxwell, and Justin R. Nodwell**

| Name | Structure                                                                         | Phenotype                                                                         | Name | Structure                                                                          | Phenotype                                                                           |
|------|-----------------------------------------------------------------------------------|-----------------------------------------------------------------------------------|------|------------------------------------------------------------------------------------|-------------------------------------------------------------------------------------|
| CB-1 | 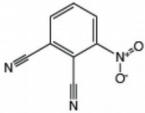 |  | AS-5 |  |  |
| CB-4 |  |  | EN-1 |  |  |
| CB-6 |  |  | EN-3 |  |  |
| AS-3 |  |  | EN-4 |  |  |
| AS-4 |  |  | EN-7 |  |  |

**Figure S1, related to Figure 1.** Chemical structures and inhibition of *S. venezuelae* sporulation by the screening hits. 10  $\mu$ L of each molecule was added to the drug disk, placed on a lawn of *S. venezuelae* spores and incubated at 30  $^{\circ}$ C for 48 hours before imaging. The EN-1 and AS-5 stocks were 10 mM while the remaining were at 2.5 mM. A white horizontal line has been added for visual reference.

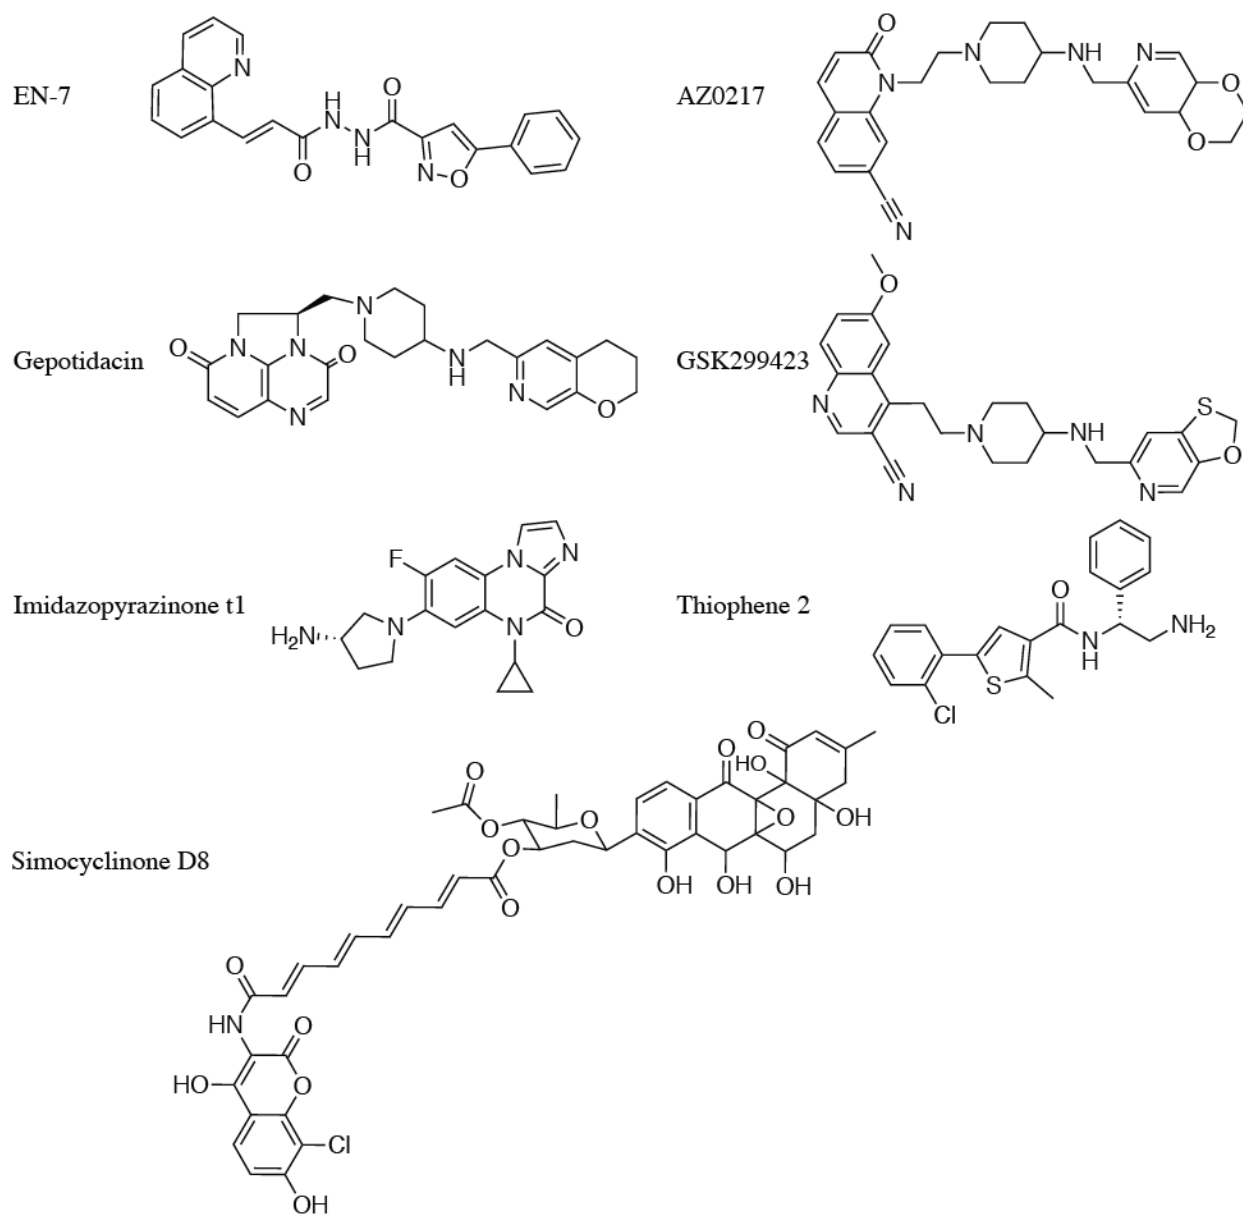

**Figure S2, related to Figure 2.** Chemical structures of EN-7 with other investigational gyrase inhibitors

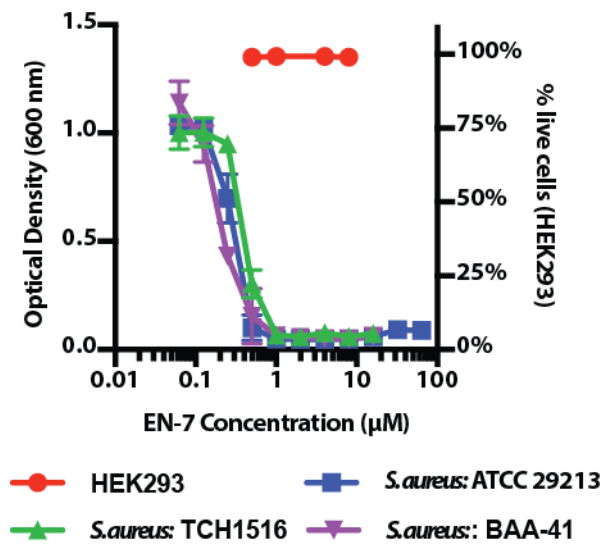

**Figure S3, related to Table 1.** EN-7 inhibits growth of Gram-positive *S. aureus* while having no effect on human cell lines, such as HEK293.

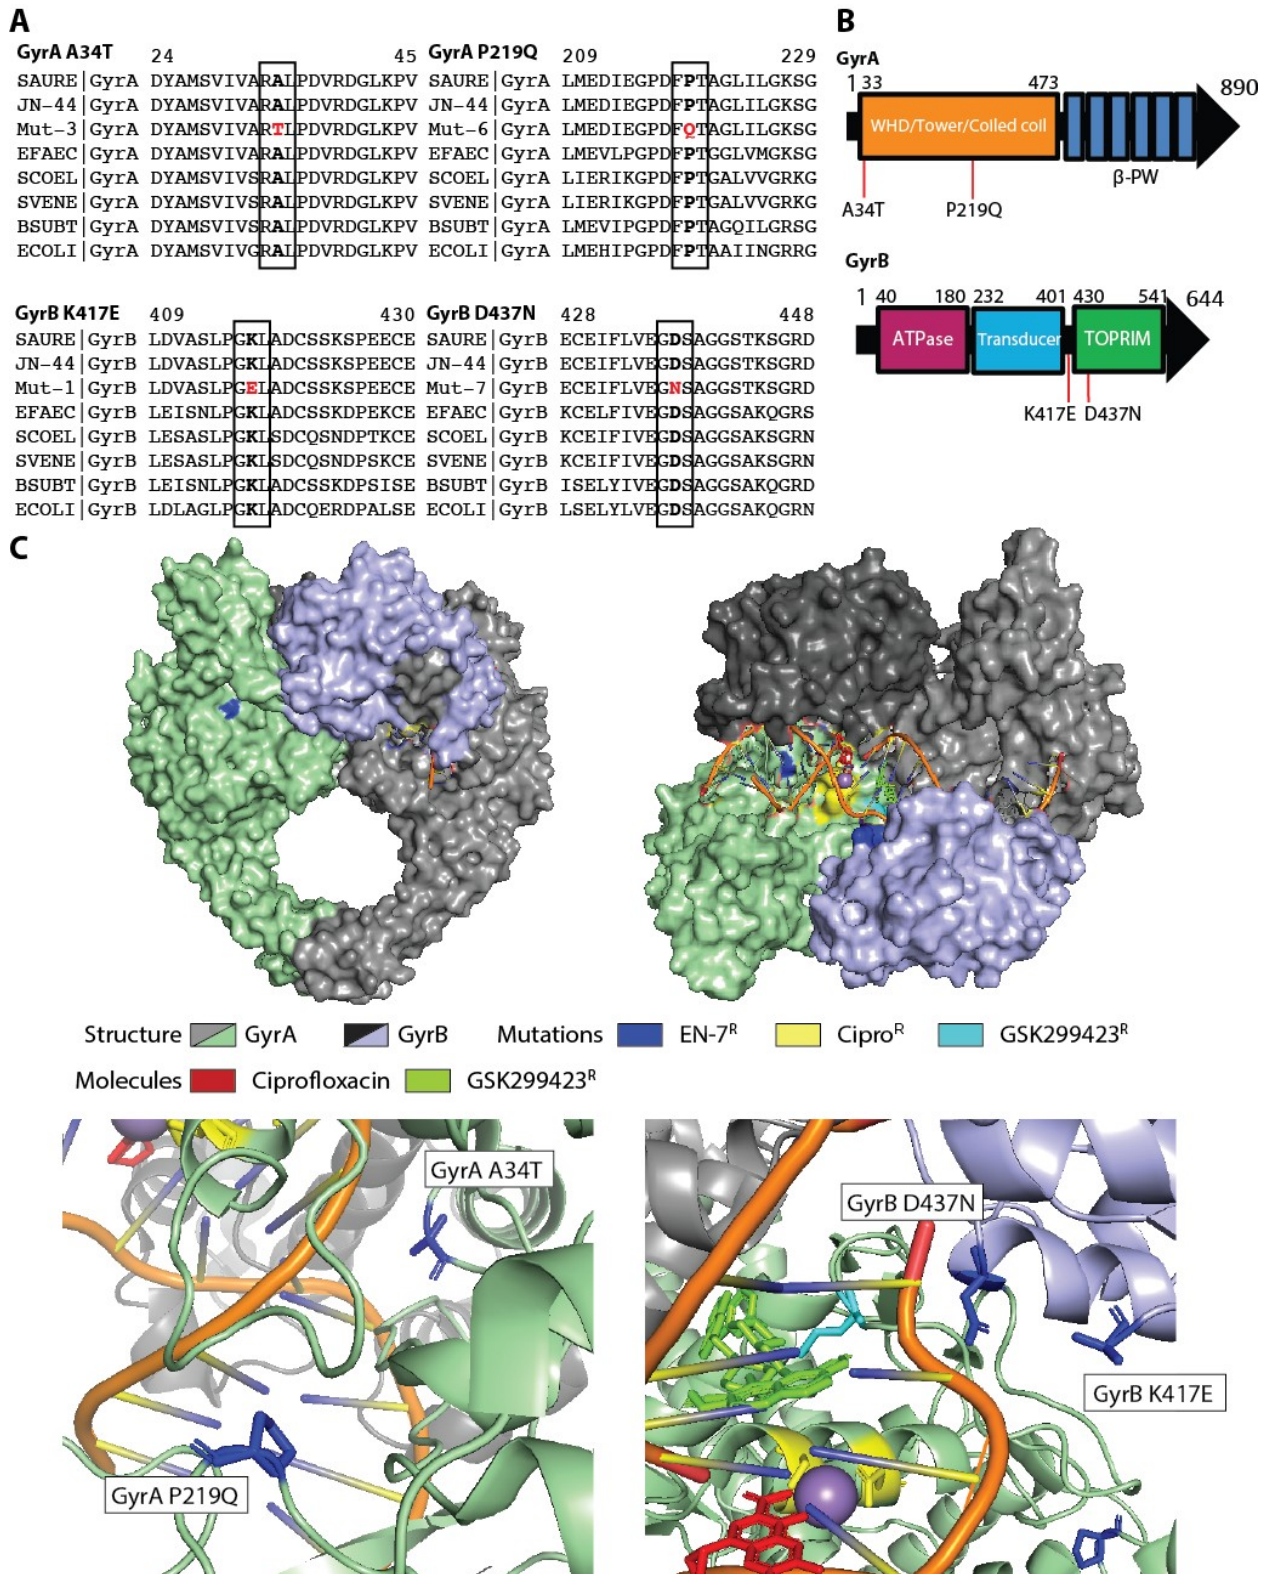

**Figure S4, related to Table 2.** Analysis of EN-7-resistance gyrase mutations. (A) Amino acid alignment of the two GyrA and two GyrB mutations found in the EN-7 resistant *S. aureus* strains against published *S. aureus* (SAURE), parent strain (JN-44), *Enterococcus faecalis* (EFAEC), *Streptomyces coelicolor* (SCOEL),

*Streptomyces venezuale* (SVENE), *Bacillus subtilis* (BSUBT), and *Escherichia coli* (ECOLI) sequences. (B) Location of EN-7 resistant mutations on linear GyrA and GyrB domain structure. (C) Location of EN-7 resistant mutations mapped to a published gyrase crystal structure. The structural information was created by overlaying a *S. aureus* gyrase structure with GSK299423 (2XCS) and a *S. aureus* gyrase structure with ciprofloxacin (2XCT). Ciprofloxacin is depicted in the structure as red while GSK299423 is green. Resistance determinants for EN-7 (blue), ciprofloxacin (yellow), and GSK299423 (teal) are also depicted.

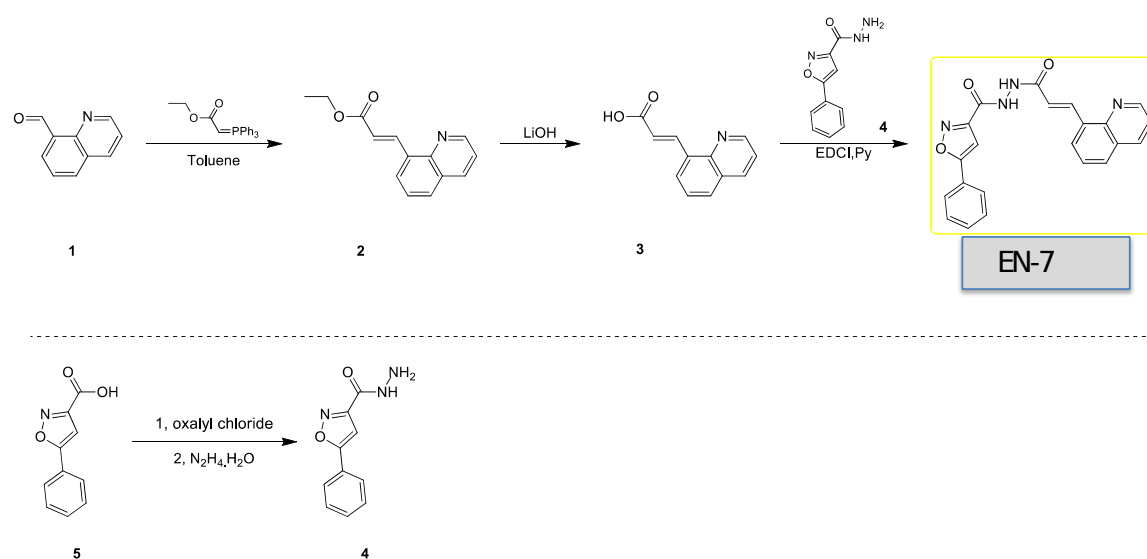

**Figure S5, related to STAR Method, Synthesis and characterization of EN-7**

| Strain            | C0117    | C0023 | C0112 | C0017 | C0032 | C0018 | C0019 | C0024 | Resistance elements | Product                                         | Inhibited antibiotics           |
|-------------------|----------|-------|-------|-------|-------|-------|-------|-------|---------------------|-------------------------------------------------|---------------------------------|
|                   | MIC (μM) | 128   | 1     | 4     | 1     | 128   | 128   | 1     |                     |                                                 |                                 |
| <i>parE</i> P585S | 128      |       |       |       |       |       |       |       |                     | Modified topoisomerase IV                       | No reference                    |
| ErmA              | 1        |       |       |       |       |       |       |       |                     | Ribosomal RNA methyltransferase                 | Macrolides                      |
| ANT(4')-Ib        | 4        |       |       |       |       |       |       |       |                     | Nucleotidyltransferase                          | Aminoglycosides                 |
| ANT(9)-Ia         | 1        |       |       |       |       |       |       |       |                     | Nucleotidyltransferase                          | Aminoglycosides                 |
| <i>blaZ</i>       | 128      |       |       |       |       |       |       |       |                     | Beta-lactamase s                                | Beta-lactams                    |
| SAT-4             | 128      |       |       |       |       |       |       |       |                     | Acetyltransferase                               | Nucleosides                     |
| <i>mphC</i>       | 128      |       |       |       |       |       |       |       |                     | Phosphotransferase                              | Macrolides                      |
| APH(3')-IIIa      | 128      |       |       |       |       |       |       |       |                     | Phosphotransferase                              | Macrolides                      |
| <i>berA</i>       | 128      |       |       |       |       |       |       |       |                     | ABC efflux pump                                 | Bacitracin                      |
| <i>gyrB</i> K66Q  | 128      |       |       |       |       |       |       |       |                     | Modified gyrase                                 | No reference                    |
| <i>gyrA</i> R246C | 128      |       |       |       |       |       |       |       |                     | Modified gyrase                                 | No reference                    |
| <i>gyrA</i> T457A | 128      |       |       |       |       |       |       |       |                     | Modified gyrase                                 | No reference                    |
| <i>gyrA</i> D459N | 128      |       |       |       |       |       |       |       |                     | Modified gyrase                                 | No reference                    |
| <i>gyrA</i> S85P  | 128      |       |       |       |       |       |       |       |                     | Modified gyrase                                 | Fluoroquinolones                |
| <i>gyrA</i> S84L  | 128      |       |       |       |       |       |       |       |                     | Modified gyrase                                 | Fluoroquinolones                |
| <i>mecI</i>       | 128      |       |       |       |       |       |       |       |                     | PBP2A                                           | Beta-lactams                    |
| <i>mprF</i>       | 128      |       |       |       |       |       |       |       |                     | Modified phosphatidylglycerol                   | Daptomycin                      |
| <i>tet38</i>      | 128      |       |       |       |       |       |       |       |                     | MFS efflux pump                                 | Tetracycline                    |
| Sav1866           | 128      |       |       |       |       |       |       |       |                     | ABC efflux pump                                 | Multidrug                       |
| <i>norB</i>       | 128      |       |       |       |       |       |       |       |                     | MFS efflux pump                                 | Fluoroquinolones & Tetracycline |
| <i>norA</i>       | 128      |       |       |       |       |       |       |       |                     | MFS efflux pump                                 | Fluoroquinolones & Tetracycline |
| <i>murA</i>       | 128      |       |       |       |       |       |       |       |                     | UDP-N-acetylglucosamine enolpyruvyl transferase | Fosfomycin                      |
| <i>mgrA</i>       | 128      |       |       |       |       |       |       |       |                     | MFS efflux pump                                 | Multidrug                       |
| <i>mepR</i>       | 128      |       |       |       |       |       |       |       |                     | MATE transporter                                | Tetracycline                    |
| <i>mepA</i>       | 128      |       |       |       |       |       |       |       |                     | MATE transporter                                | Tetracycline                    |
| <i>mecRI</i>      | 128      |       |       |       |       |       |       |       |                     | PBP2A                                           | Beta-lactams                    |
| <i>mecC</i>       | 128      |       |       |       |       |       |       |       |                     | PBP2A                                           | Beta-lactams                    |
| <i>lmrB</i>       | 128      |       |       |       |       |       |       |       |                     | ABC efflux pump                                 | Lincosamides                    |
| <i>EF-Tu</i>      | 128      |       |       |       |       |       |       |       |                     | Elongation factor Tu                            | Kirromycin                      |
| <i>cls</i>        | 128      |       |       |       |       |       |       |       |                     | Cardiolipin synthetase                          | Daptomycin                      |
| <i>dfrC</i>       | 128      |       |       |       |       |       |       |       |                     | Dihydrofolate reductase                         | Trimethoprim                    |
| <i>ileS</i>       | 128      |       |       |       |       |       |       |       |                     | Isoleucyl-tRNA synthetase                       | Mupirocin                       |
| <i>arlS</i>       | 128      |       |       |       |       |       |       |       |                     | MFS efflux pump                                 | Fluoroquinolones                |
| <i>alaS</i>       | 128      |       |       |       |       |       |       |       |                     | Alanyl-tRNA synthetase                          | Novobiocin                      |
| <i>arlR</i>       | 128      |       |       |       |       |       |       |       |                     | MFS efflux pump                                 | Fluoroquinolones                |

**Table S1, related to Table 1.** EN-7 inhibits growth of extensively resistant *S. aureus* clinical strains. Blue boxes indicates that the corresponding antibiotic resistance gene was found within the clinical strain's genome. A white box indicates that the gene was absent in the genome.
